# Supplementary material for: Organic nanotubes assembled from isophthalamides and their application as templates to fabricate Pt nanotubes
Source: Royal Society of Chemistry journal article supplement (doi:10.1039/b900843h), 2009-01-01

## Supporting Information

### Organic nanotubes assembled from isophthalamides and their application as templates to fabricate Pt nanotubes

Yun-Xiang Xu, Xin Zhao, Xi-Kui Jiang and Zhan-Ting Li  
Shanghai Institute of Organic Chemistry, Chinese Academy of Sciences, 354 Fenglin Lu,  
Shanghai 200032, China

#### Contents

|                                                                                                   |     |
|---------------------------------------------------------------------------------------------------|-----|
| Synthesis and characterizations.....                                                              | 2-3 |
| <b>Figure S1.</b> XRD pattern of the nanotubes of <b>T1</b> .....                                 | 4   |
| <b>Figure S2.</b> TEM of Pt-organic nanotubes after standing for two weeks.....                   | 4   |
| <b>Table S1</b> Geometrical parameters of the NH...O hydrogen bonds.....                          | 5   |
| <sup>1</sup> H and <sup>13</sup> C NMR spectra of <b>T1</b> and <b>T2</b> and intermediates ..... | 6-9 |

## Synthesis and Characterization

**General methods.** Melting points are uncorrected. All reagents and chemicals were obtained from commercial sources and used without further purification unless otherwise noted. The solvents have been purified by standard procedures before use. Silica gel (10- 40  $\mu$ ) was used for all column chromatography. The  $^1\text{H}$  NMR spectra were recorded on Bruker Avance 300 MHz or Varian Mercury 300 MHz spectrometers in the indicated solvents. Chemical shifts are expressed in parts per million ( $\delta$ ) using residual proton resonances of the deuterated solvents as the internal standards. MS and HR-MS were carried out in Shanghai Institute of Organic Chemistry (SIOC) MS center. Elemental analyses were obtained on a Vario EL Elemental Analyzer. X-ray crystallography was carried on a Bruker AXS Smart apex II diffractometer. Powder X-ray diffraction (XRD) patterns were recorded on a Bruker D8 Avance diffractometer. High- resolution transmission electron microscopy (HR-TEM) images and EDX were recorded on a JEOL JEM-2010 microscope equipped with energy-dispersive X-ray spectroscopy; Low-resolution transmission electron microscopy (LR-TEM) images were recorded on a JEOL JEM-1230 microscope. Scanning electron microscopy (SEM) experiments were conducted on a JEOL JSM-6390-LV microscope. 5-(benzyloxy)isophthalic acid was prepared according to the literature [Diederich, F.; Schuermann, G.; Chao, I. *J. Org. Chem.* 1988, 53, 2744-2757.]

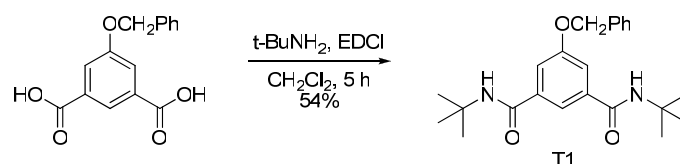

**N,N'-di-tert-butyl-3-(benzyloxy)isophthalamide (T1).** A mixture of 5-(benzyloxy)-isophthalic acid (0.27 g, 1.0 mmol), 1-(3-dimethylamino-propyl)-3-ethylcarbodiimide hydrochloride (EDCI) (0.58 g, 3.0 mmol) and tert-butylamine (0.26 mL, 2.5 mmol) in dichloromethane (15 mL) was stirred at room temperature for 5 hours. After the solvent was removed, the resulting residue was subjected to flash column chromatography ( $\text{CH}_2\text{Cl}_2$  to  $\text{CH}_2\text{Cl}_2$ /methanol 100:1) to give compound **T1** as white solid (0.21 g, 54%). M.p. 257-258  $^\circ\text{C}$ .  $^1\text{H}$  NMR ( $\text{CDCl}_3$ , 300 MHz):  $\delta$  7.65 (s, 1H), 7.44-7.27 (m, 7H), 6.09 (br, 2H), 5.11 (s, 2H), 1.46 (s, 18H).  $^{13}\text{C}$  NMR (100 MHz,  $\text{CDCl}_3$ ):  $\delta$  165.8, 158.8, 137.4, 136.1, 128.7, 128.3, 127.7, 117.2, 115.7, 70.4, 51.9, 28.7. MS (MALDI-FT):  $m/z$  383.2  $[\text{M} + \text{H}]^+$ , 405.2  $[\text{M} + \text{Na}]^+$ . Anal. Calcd for  $\text{C}_{23}\text{H}_{30}\text{N}_2\text{O}_3$ : C, 72.22; H, 7.91, N 7.32. Found: C, 72.30; H, 8.01; N, 7.08.

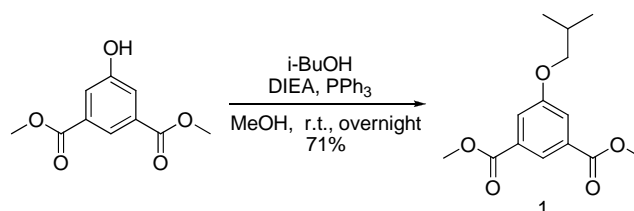

**Dimethyl 5-(isobutyloxy)isophthalate (1).** To a stirred solution of dimethyl 5-hydroxyisophthalate (4.00 g, 19.0 mmol), triphenylphosphine (5.24 g, 20.0 mmol) and isobutanol (2.40 mL, 25.9 mmol) in methanol (50 mL), N,N-diisopropyl ethylamine (4.04 g, 20.0 mmol) was added at 0  $^\circ\text{C}$ . The mixture was kept at 0  $^\circ\text{C}$  for 0.5 hour and then stirred at room

temperature overnight. After removal of the solvent with a rotavapor, the resulting residue was subjected to flash column chromatography ( $\text{CH}_2\text{Cl}_2$ /petroleum ether 1:1) to give compound **1** as a white solid (3.59 g, 71%). M.p. 50-53 °C.  $^1\text{H}$  NMR (300 MHz,  $\text{CDCl}_3$ ):  $\delta$  8.26 (s, 1H), 7.75 (s, 2H), 3.94 (s, 6H), 3.80 (d,  $J$  = 6.6 Hz, 2H), 2.18-2.05 (m, 1H), 1.04 (d,  $J$  = 6.9 Hz, 6H).  $^{13}\text{C}$  NMR (100 MHz,  $\text{CDCl}_3$ ):  $\delta$  166.2, 159.4, 131.7, 122.7, 119.9, 75.0, 52.3, 28.2, 19.1. MS (EI):  $m/z$  266  $[\text{M}]^+$ . Anal. Calcd for  $\text{C}_{14}\text{H}_{18}\text{O}_5$ : C, 63.15; H, 6.81. Found: C, 63.21; H, 6.68.

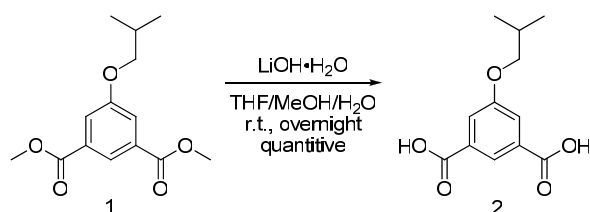

**5-(isoButyloxy)isophthalic Acid (2)** To a stirred solution of compound **1** (0.69 g, 2.59 mmol) in THF (12 mL), methanol (4 mL), and water (4 mL) was added lithium hydroxide monohydrate (0.24 g, 5.70 mmol). The mixture was stirred at room temperature overnight and the solvent removed with a rotavapor. The resulting residue was acidified with hydrochloric acid (1 N) to pH = 1 and the formed precipitate was filtered, washed with water (20 mL  $\times$  2), dried under vacuum to give compound **2** as a white solid (0.62 g, 100%). M.p. 230 °C (sublimation)  $^1\text{H}$  NMR (300 MHz,  $\text{DMSO}-d_6$ ):  $\delta$  13.25 (s, 2H), 8.09 (s, 1H), 7.65 (s, 2H), 3.87 (m, 2H), 2.08-2.00 (m, 1H), 1.01 (d,  $J$  = 4.5 Hz, 6H).  $^{13}\text{C}$  NMR (100 MHz,  $\text{DMSO}-d_6$ ):  $\delta$  166.4, 158.9, 132.6, 122.1, 119.0, 74.2, 27.6, 18.9. MS (ESI):  $m/z$  237.1  $[\text{M} - \text{H}]^-$ . HRMS (EI)  $m/z$  Calcd for  $\text{C}_{12}\text{H}_{14}\text{O}_5$   $[\text{M}]^+$  238.0841, Found 238.0837. Anal. Calcd for  $\text{C}_{12}\text{H}_{14}\text{O}_5$ : C, 60.50; H, 5.92. Found: C, 60.38; H, 5.92.

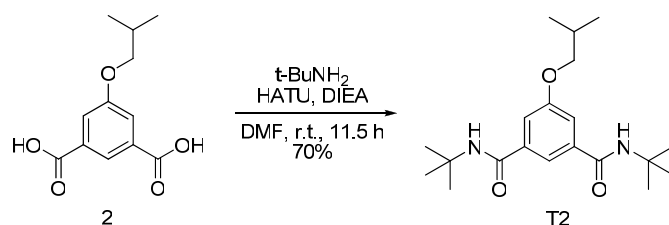

**N,N'-di-tert-butyl-3-(isobutyloxy)isophthalamide (T2)** A mixture of 5-(isobutyloxy)isophthalic acid (0.24 g, 1.00 mmol), tert-butylamine (0.26 mL, 2.5 mmol), *o*-(7-azabenzotriazol-1-yl)-*N,N,N',N'*-tetramethyluroniumhexafluorophosphate (HATU) (1.14g, 3.00 mmol), and *N,N*-diisopropylethylamine (DIEA) (1.55 mL, 9.00 mmol) in DMF (10 mL) was stirred at room temperature for 11.5 hours. Upon removal of the solvent, the resulting residue was subjected to flash column chromatography ( $\text{CH}_2\text{Cl}_2$ /petroleum ether 1:2 to 1:1) to give **T2** as a white solid (0.24 g, 70%). Single crystal for X-ray crystallography was grown from ethyl acetate-methanol by slow evaporation. M.p. 260 °C (decomp.)  $^1\text{H}$  NMR ( $\text{CDCl}_3$ , 300 MHz):  $\delta$  7.60 (s, 1H), 7.35 (s, 2H), 6.09 (s, 2H), 3.78 (d,  $J$  = 6.6 Hz, 2H), 2.12-2.04 (m, 1H), 1.46 (s, 18H), 1.01 (d,  $J$  = 6.6 Hz, 6H).  $^{13}\text{C}$  NMR (100 MHz,  $\text{CDCl}_3$ ):  $\delta$  166.0, 159.3, 137.3, 116.6, 115.4, 74.8, 51.8, 28.8, 28.2, 19.1. MS (EI):  $m/z$  348  $[\text{M}]^+$ . Anal. Calcd for  $\text{C}_{20}\text{H}_{32}\text{N}_2\text{O}_3$ : C, 68.93; H, 9.26; N, 8.04. Found: C, 69.35; H, 9.40; N, 7.71.

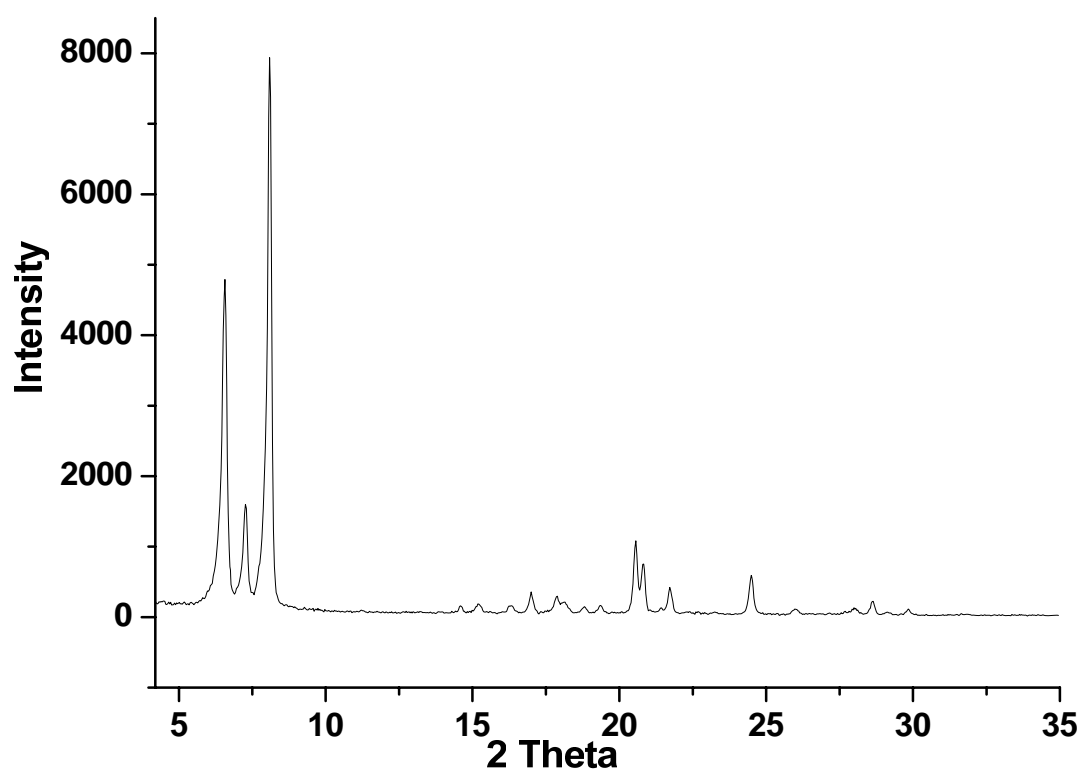

**Figure S1.** Powder XRD pattern of the **T1** nanotubes obtained from methanol.

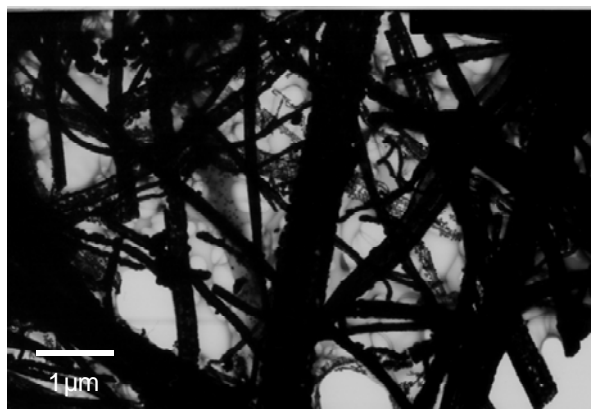

**Figure S2.** TEM image of Pt-organic nanotubes after standing for two weeks.

**Table S1** Geometrical parameters of the NH...O hydrogen bonds<sup>a</sup>

| Atoms      | Bond angle (°) | Bond length (Å) |
|------------|----------------|-----------------|
| N1 H1A O4  | 152.77         | 2.089           |
| N2 H2B O5  | 161.38         | 2.056           |
| N3 H3A O7  | 157.90         | 2.101           |
| N4 H4B O8  | 144.70         | 2.087           |
| N5 H5A O2A | 154.82         | 2.084           |
| N6 H6B O1A | 148.34         | 2.101           |

<sup>a</sup> Symmetry code: -x +1/2, y -1/2, -z +1/2.

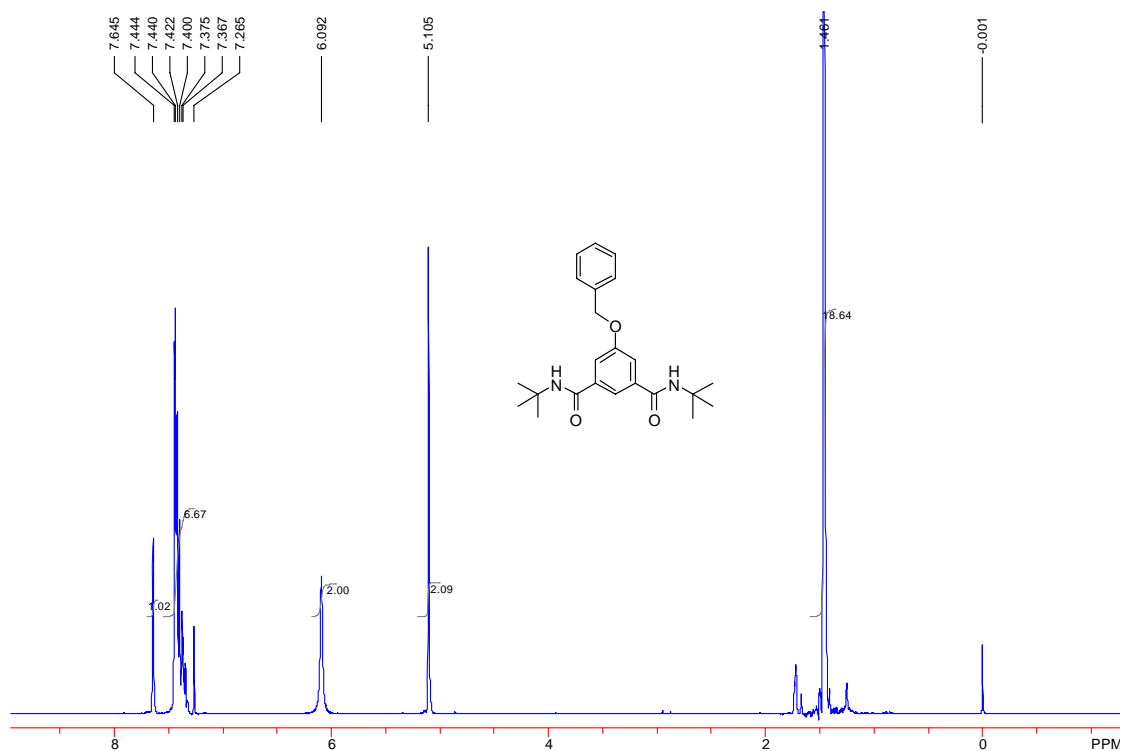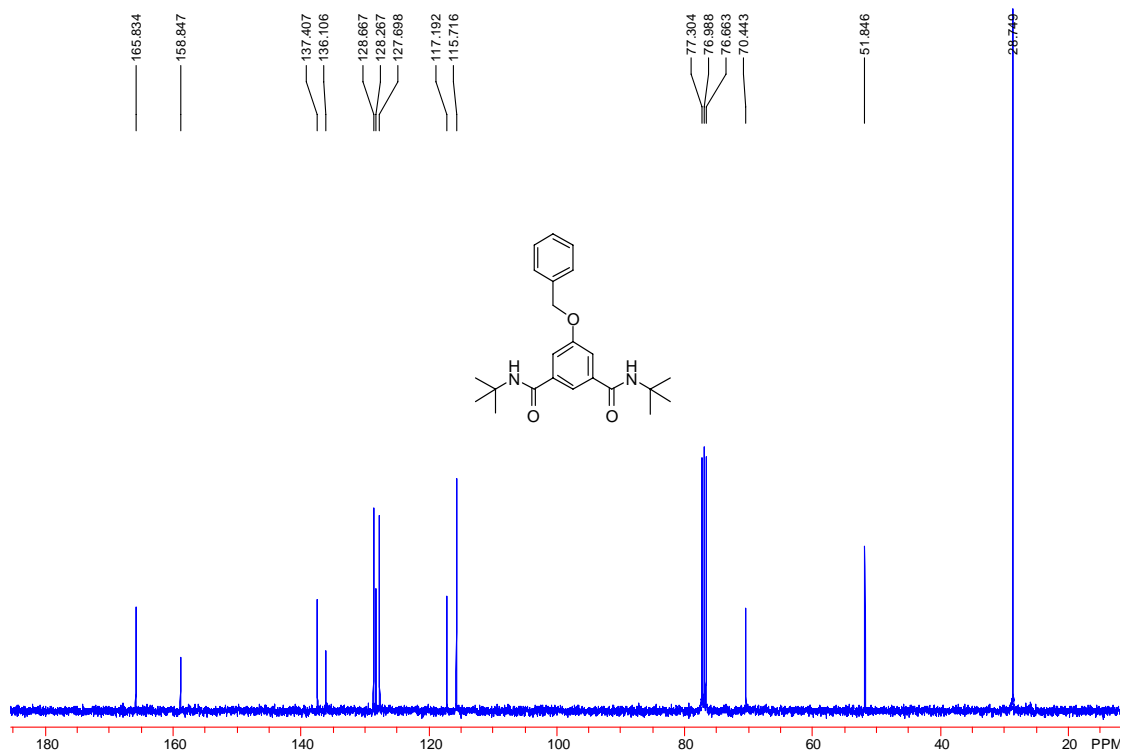

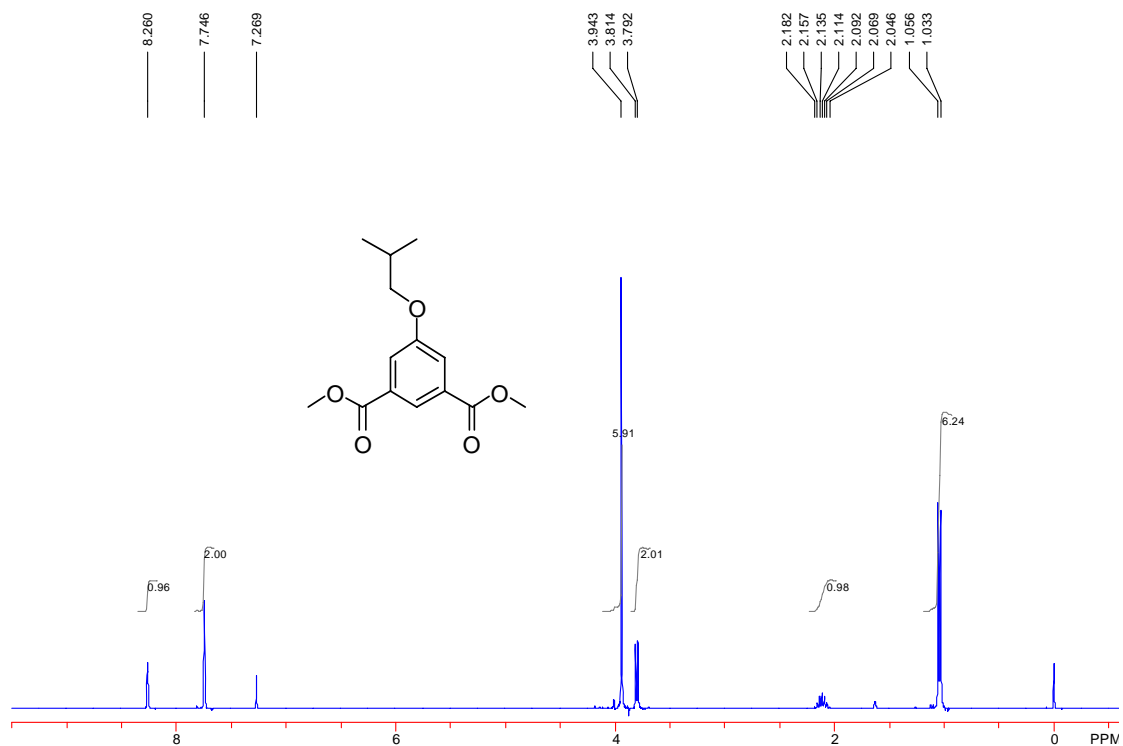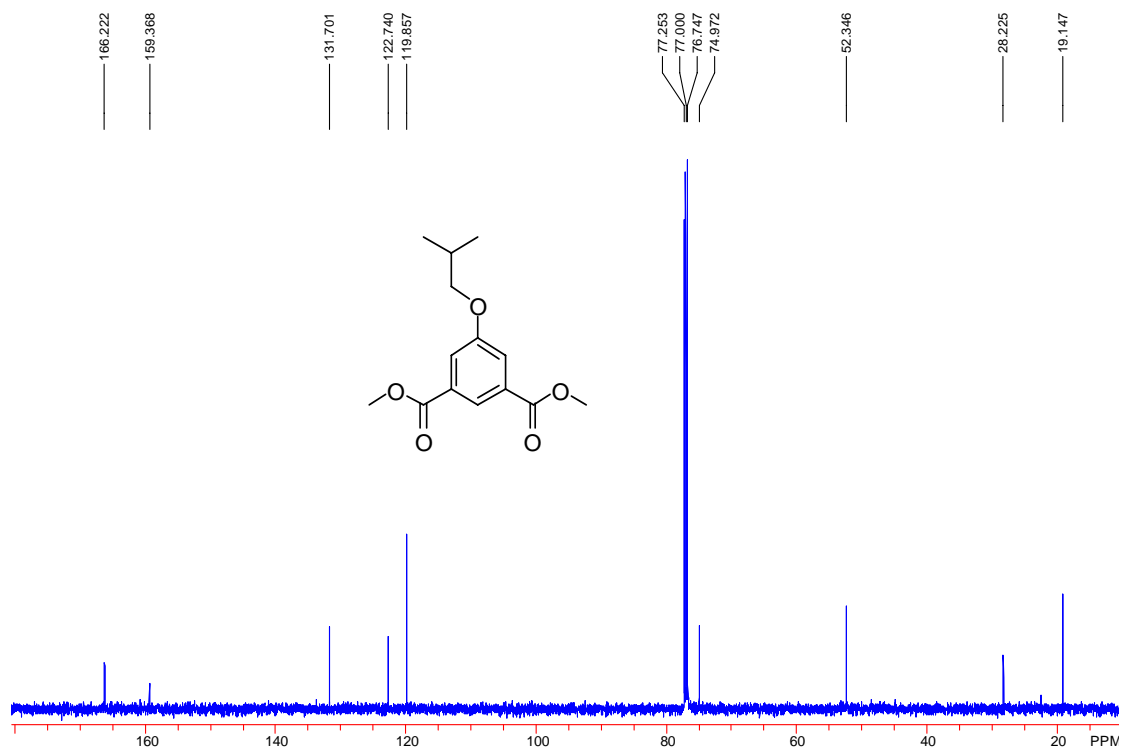

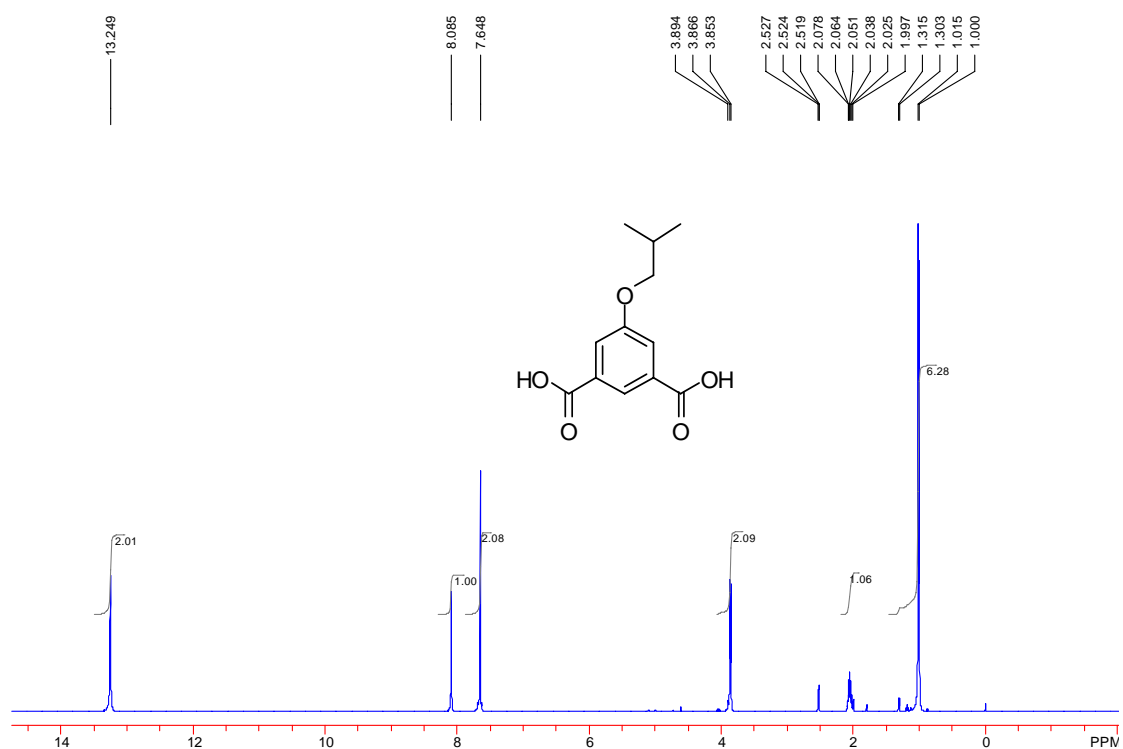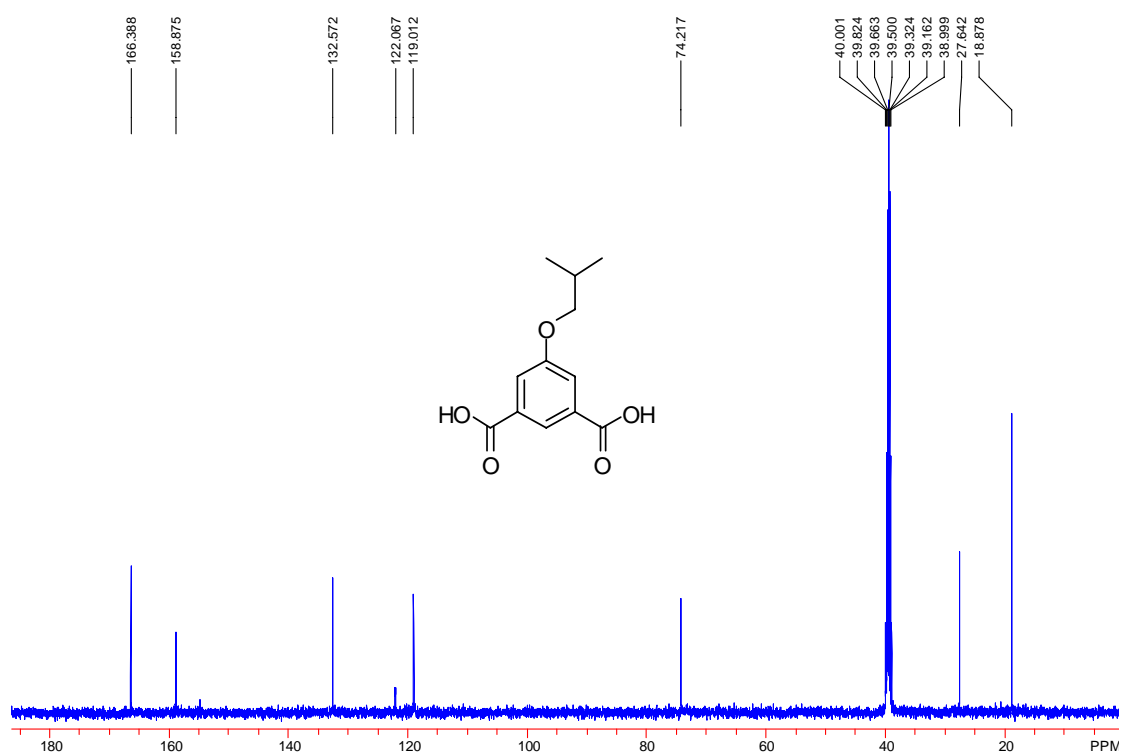

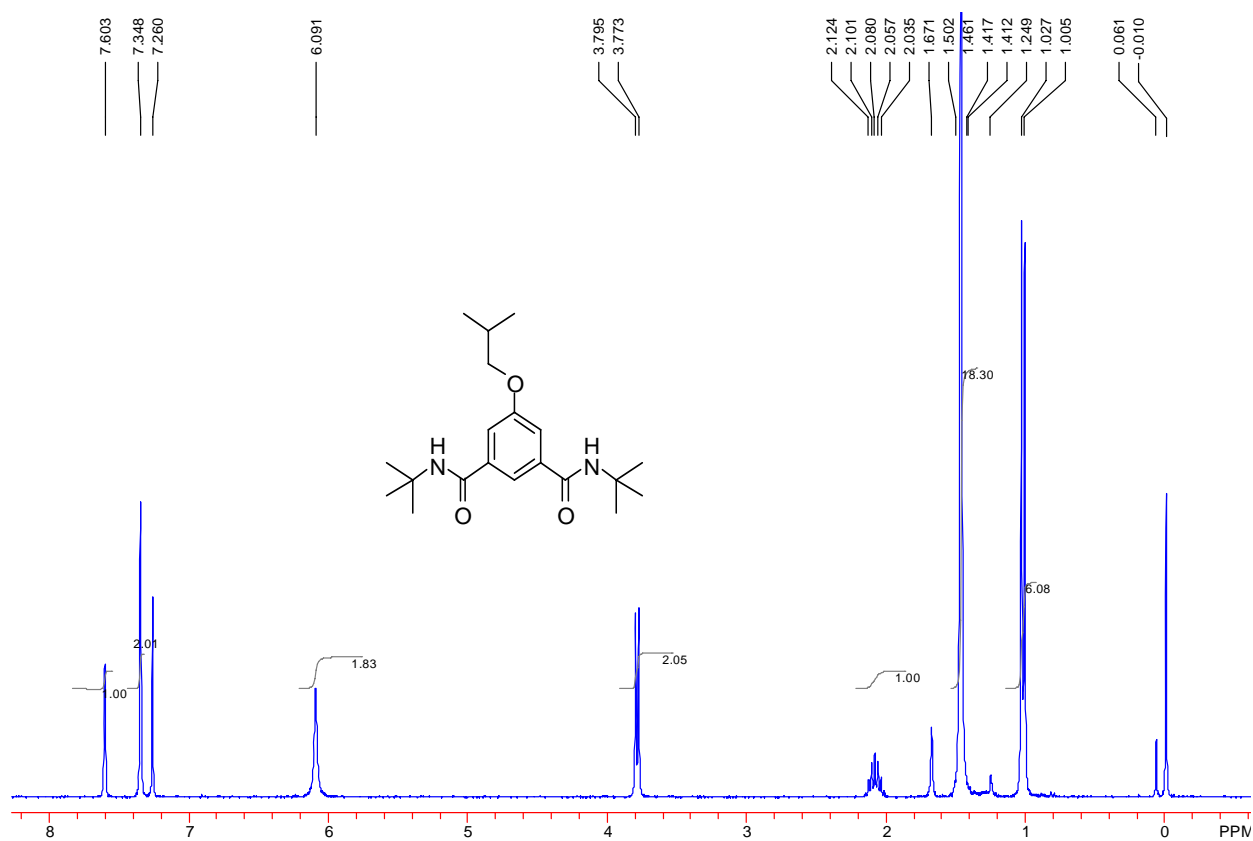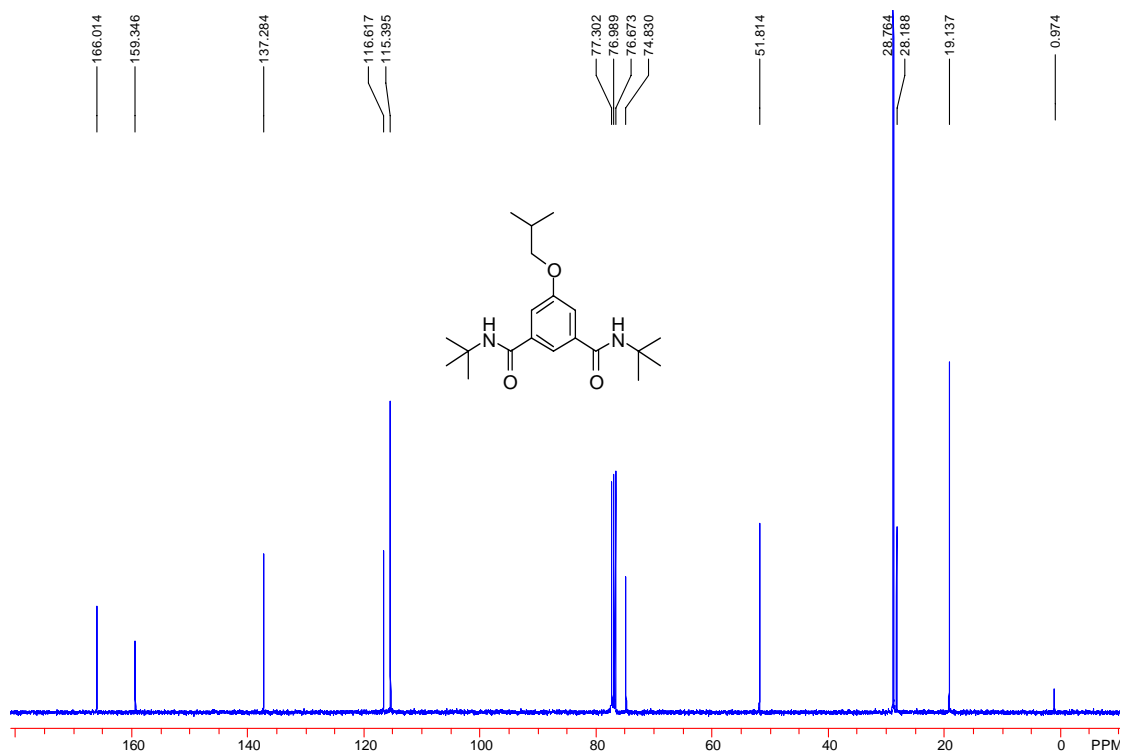

Supplement: b900843h.pdf [file b900843h.pdf]
